# Supplementary material
Source: Research Square preprint supplement (doi:10.21203/rs.3.rs-8651885/v1)
Supplement: Supplementary file 1 [file 2455b3cc69f35c83588521bc.docx]

**Appendix A**

**RQ3 RESEARCH GAP VARIABLES AND CODING TABLE**

| **No.** | **Code** | **Variable Name** | **Detailed Explanation** |
| --- | --- | --- | --- |
| 1 | C1 | Insufficient discipline-/task-specific evidence | Lack of empirical research targeted at specific disciplines or tasks, failing to address context-specific application scenarios |
| 2 | C2 | Insufficient attention to student stage/experience differences | Inadequate exploration of variations in student performance and adaptation based on proficiency levels (novice vs. advanced) and developmental stages |
| 3 | C3 | Insufficient pedagogy/curriculum integration and guidelines | Deficiencies in research on studio pedagogy, as well as the development and adaptation of curriculum guidelines for targeted educational practices |
| 4 | C4 | Insufficient AI literacy, prompt engineering, and skill cultivation | Lack of focus on fostering students’ AI literacy, prompt design capabilities, and related practical skill development |
| 5 | C5 | Insufficient research on attitudes/psychological mechanisms and measurement | Inadequate investigation of student acceptance, attitudes, personality traits, and other psychological constructs, along with a lack of validated measurement scales |
| 6 | C6 | Unclear human-AI collaboration process mechanisms | Ambiguity regarding interaction patterns, optimal timing of AI intervention, effective usage strategies, and control/learnability in human-AI collaborative processes |
| 7 | C7 | Insufficient coverage of creativity/design processes | Limited research on AI’s impact on creative processes, risks of homogenization in outcomes, and inadequate attention to empathy/testing phases and motivational factors |
| 8 | C8 | Ethical governance, authorship, and intellectual property issues | Unaddressed challenges related to ethical frameworks, ownership of AI-assisted works, academic misconduct, and research integrity in educational contexts |
| 9 | C9 | Inadequate research design: longitudinal/causal/career tracking | Overreliance on cross-sectional studies, with insufficient longitudinal research, causal inference analyses, and long-term career outcome tracking |
| 10 | C10 | Insufficient generalizability and evidence strength | Limitations in cultural generalizability, cross-disciplinary applicability, and lack of large-sample validation to enhance evidence robustness |
| 11 | G1 | discipline-specific + stage-specific acceptance | Corresponding Core Variables: C1 + C2 + C5 |
| 12 | G2 | Insufficient attitudinal research + discipline-specific challenges in industrial design + inadequate qualitative studies | Corresponding Core Variables: C1 + C5 |
| 13 | G3 | Cultivation of AI skills + novice-AI interaction | Corresponding Core Variables: C2 + C4 + C6 |
| 14 | G4 | Insufficient studio pedagogy guidelines + protection of fundamental creative skills | Corresponding Core Variables: C3 + C7 |
| 15 | G5 | Abundant research on workflow/acceptability + insufficient pedagogical integration | Corresponding Core Variables: C3 |
| 16 | G6 | Consistent with G3 | Corresponding Core Variables: C2 + C4 + C6 |
| 17 | G7 | Consistent with G3 | Corresponding Core Variables: C2 + C4 + C6 |
| 18 | G8 | Insufficient research on advertising design education + impact on motivation/creative processes | Corresponding Core Variables: C1 + C7 |
| 19 | G9 | Lack of task analysis for optimal AI use in art education + AI literacy/prompt engineering training | Corresponding Core Variables: C1 + C4 + C6 (Add C3 if emphasizing "curriculum training") |
| 20 | G10 | Dark personality × AI use + academic misconduct/integrity | Corresponding Core Variables: C1 + C5 + C8 |
| 21 | G11 | Impact of intervention timing on creativity + homogenization risks + interaction patterns | Corresponding Core Variables: C6 + C7 |
| 22 | G12 | Longitudinal impacts + ownership/authorship + curriculum adaptation | Corresponding Core Variables: C3 + C8 + C9 |
| 23 | G13 | Long-term impacts + ethical frameworks + learning style differences + interaction patterns | Corresponding Core Variables: C5 + C6 + C7 + C8 + C9 |
| 24 | G14 | Need for longitudinal evaluation | Corresponding Core Variables: C9 |
| 25 | G15 | Insufficient attention to empathy/testing phases | Corresponding Core Variables: C7 |
| 26 | G16 | Cross-sectional limitations + cultural scope | Corresponding Core Variables: C9 + C10 |
| 27 | G17 | Causal inference + cultural generalizability | Corresponding Core Variables: C9 + C10 |
| 28 | G18 | Need for longitudinal career tracking | Corresponding Core Variables: C9 |
| 29 | G19 | Large-sample validation requirements | Corresponding Core Variables: C10 |
| 30 | G20 | Need for broader cross-disciplinary research | Corresponding Core Variables: C10 |

**Appendix B**

|  | **Database** | **Retrieval Date** | **Search String** | **Additional Restrictions** |
| --- | --- | --- | --- | --- |
| **1** | Web of Science | 2025/12 | *TS=( ( "art student*" OR "design student*" OR "art education" OR "design education" ) AND ("generative AI" OR "AI art tool*" OR "text-to-image" OR "ChatGPT" OR "DALL-E") )* | English |
| **2** | Scopus | 2025/12 | *( TITLE-ABS-KEY ( "art student*" OR "design student*" OR "visual arts" ) AND TITLE-ABS-KEY ( "higher education" OR "undergraduate" ) AND TITLE-ABS-KEY ( "generative ai" ) ) AND TITLE-ABS-KEY ( "anxiety" OR "threat" OR "technostress" )* | English |
| **3** | IEEE Xplore | 2025/12 | *( ("Metadata Title":"art student*" OR "Abstract":"art student*" OR "Abstract":"design student*" OR "Abstract":"art education" OR "Abstract":"design education" OR "Author Keywords":"art" OR "Author Keywords":"design") AND ("Abstract":"generative AI" OR "Abstract":"AI art tool*" OR "Abstract":"text-to-image" OR "Author Keywords":"generative AI" OR "Author Keywords":"AI") ) AND ("Abstract":anxiety OR "Abstract":attitude* OR "Abstract":perception* OR "Abstract":acceptance OR "Abstract":satisfaction OR "Abstract":challenge* OR "Abstract":concern* OR "Author Keywords":attitude OR "Author Keywords":acceptance)* | Supplemental keywords for IEEE Xplore: User Experience, User Satisfaction, Creativity, Human-computer Interaction, Creative Process |
